# Supplementary material for: Advances in nanomaterials for electrochromic devices
Source: Royal Society of Chemistry journal article supplement (doi:10.1039/d0cs00317d), 2020-01-01
Supplement: d0cs00317d1.pdf [file d0cs00317d1.pdf]

# Supporting information

## Advances in nanomaterials for electrochromic devices

*Guojian Yang,<sup>a,b</sup> Yu-Mo Zhang,<sup>\*a,b</sup> Yiru Cai,<sup>b</sup> Baige Yang,<sup>a,b</sup> Chang Gu,<sup>a,b</sup> and Sean Xiao-An Zhang<sup>\*a,b</sup>*

a. State Key Laboratory of Supramolecular Structure and Materials, Jilin University, Changchun, 130012, P. R. China.

b. College of Chemistry, Jilin University, Changchun, 130012, P. R. China.

Email: zhangyumo@jlu.edu.cn; seanzhang@jlu.edu.cn.

## **Table of contents**

|           |                                                          |          |
|-----------|----------------------------------------------------------|----------|
| <b>1.</b> | <b>Contents of the review article.....</b>               | <b>3</b> |
| <b>2.</b> | <b>Abbreviations appeared in the review article.....</b> | <b>4</b> |

# Contents

|                                                            |    |
|------------------------------------------------------------|----|
| <b>Abstract</b> .....                                      | 1  |
| <b>1. Introduction</b> .....                               | 1  |
| <b>2. Performance parameters of ECDs</b> .....             | 4  |
| 2.1 Switching time and response rate.....                  | 4  |
| 2.2 Optical modulation and contrast ratio.....             | 5  |
| 2.3 Long-term stability and durability.....                | 5  |
| 2.4 Coloration efficiency.....                             | 5  |
| 2.5 Memory effect.....                                     | 5  |
| <b>3. Nanomaterials applied in ECDs</b> .....              | 5  |
| <b>3.1 Nanomaterials for the EC layer</b> .....            | 5  |
| 3.1.1 Inorganic EC nanomaterials.....                      | 6  |
| 3.1.2 Organic EC nanomaterials.....                        | 8  |
| 3.1.3 Metal complexes EC nanomaterials.....                | 10 |
| 3.1.4 Hybrid EC nanomaterials.....                         | 12 |
| <b>3.2 Nanomaterials for the ion storage layer</b> .....   | 14 |
| <b>3.3 Nanomaterials for the ion transport layer</b> ..... | 16 |
| <b>3.4 Nanomaterials for electrodes</b> .....              | 18 |
| 3.4.1 Silver nanowires (Ag NWs) .....                      | 18 |
| 3.4.2 Carbon nanotubes (CNTs) .....                        | 20 |
| 3.4.3 Graphene.....                                        | 21 |
| 3.4.4 Doped metal oxides nanostructures.....               | 22 |
| 3.4.5 Hybrid conductive materials.....                     | 24 |
| 3.4.6 Summary of the nanomaterials for electrodes.....     | 25 |
| <b>4. Conclusions and prospects</b> .....                  | 25 |
| Conflicts of interest.....                                 | 27 |
| Acknowledgements.....                                      | 27 |
| References.....                                            | 27 |

## Abbreviations

### A

A - absorbance  
Ag NW - silver nanowire  
AZO - aluminum doped zinc oxide  
ATO - antimony doped tin oxide

### C

CE - coloration efficiency  
CNT - carbon nanotube  
CV - cyclic voltammetry  
CVD - chemical vapor deposition

### E

EC - electrochromic  
ECD - electrochromic device  
e-field - electric field  
eqn. - equation  
e-skin - electronic skin

### F

FTO - fluorine-doped tin dioxide

### G

G - graphene

### I

ITO - indium tin oxide

### L

LCD - liquid crystal display  
LED - light emitting diode

### M

MOF - metal-organic framework  
MWCNT - multiwalled carbon nanotube  
MWNT - multiwalled carbon nanotube

### N

NC - nanocube  
NF - nanofiber

NIR - near infrared ray

NP - nanoparticle

NR - nanorod

NS - nanosheet

NT - nanotube

NW - nanowire

### O

OLED - organic light emitting diode

### P

PAN - polyaniline

PANI - polyaniline

PDMS - polydimethylsiloxane

PEDOT:PSS -

poly(3,4-ethylenedioxythiophene):poly(styrenesulfonate)

PET - polyethylene terephthalate

### R

rGO - reduced graphene oxide

RGO - reduced graphene oxide

### S

SWCNT - single-walled carbon nanotube

SWNT - single-walled carbon nanotube

### T

T - transmittance

TPA - triphenylamine

### V

VIS - visible

### Others

0D - zero dimensional

1D - one dimensional

2D - two dimensional

3D - three dimensional
